# Supplementary material for: Communications coopératives dans les réseaux autour du corps humain
Source: Royal Society of Chemistry journal article supplement (doi:10.1039/b611502k), 2013-06-21
Supplement: b611502k.pdf [file b611502k.pdf]

*Supporting Information*

**One-Pot Approach to Chiral Chromenes *via* Enantioselective Organocatalytic Domino Oxa-Michael-Aldol Reaction**

*Hao Li,<sup>†</sup> Jian Wang,<sup>†</sup> Timiyin E-Nunu,<sup>†</sup> Liansuo Zu,<sup>†</sup> Wei Jiang,<sup>†</sup> Shaohua Wei<sup>‡,\*</sup> and Wei Wang<sup>†,\*</sup>*

<sup>†</sup>Department of Chemistry, University of New Mexico, Albuquerque, NM 87131-0001

<sup>‡</sup>Department of Chemistry, Nanjing Normal University, Nanjing 210097, P. R. China

**General Information:** Commercial reagents were used as received, unless otherwise stated. Merck 60 silica gel was used for chromatography, and Whatman silica gel plates with fluorescence F<sub>254</sub> were used for thin-layer chromatography (TLC) analysis. <sup>1</sup>H and <sup>13</sup>C NMR spectra were recorded on Bruker Avance 500, and tetramethylsilane (TMS) was used as a reference. Data for <sup>1</sup>H are reported as follows: chemical shift (ppm), and multiplicity (s = singlet, d = doublet, t = triplet, q = quartet, m = multiplet). Data for <sup>13</sup>C NMR are reported as ppm.

**General Procedure for addition of 2-Hydroxy-benzaldehydes to unsaturated aldehydes (Table 2):**

To a solution of a *trans*-cinnamaldehyde (**1a**) (0.1 mmol) in the presence of catalyst **III** (30 mol %), benzoic acid (0.03 mmol) and 4Å MS (50 mg) in 1, 2-dichloroethane (0.5 mL) was added a 2-salicylaldehyde (**2a**) (1.0 mmol) and the resulting solution was stirred at specified temperature for a specified time. The reaction mixture was directly purified by silica gel chromatography and fractions were collected and concentrated *in vacuo* to give a pure product.

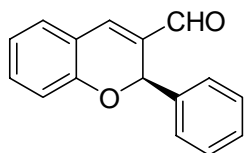

**2-Phenyl-2H-chromene-3-carbaldehyde (Table 2, entry 1):** The title compound was prepared according to the typical procedure, as described above in 87% yield. <sup>1</sup>H NMR (500 MHz, CDCl<sub>3</sub>, TMS): δ 9.64 (s, 1H; CHO), 7.40 (s, 1H; CH), 7.34-7.36 (m, 2H; Ar), 7.24-7.30 (m, 5H; Ar), 6.94 (t, <sup>2</sup>J (H,H) = 7.5 Hz, 1H; Ar), 6.87 (d, <sup>2</sup>J (H,H) = 8.0 Hz, 1H; Ar), 6.34 (s, 1H; OCH); <sup>13</sup>C NMR (125 MHz, CDCl<sub>3</sub>, TMS): δ 190.0, 154.8, 140.8, 139.0, 133.7, 129.3, 128.6, 128.5, 126.7, 121.7, 119.9, 117.1, 74.2; [α]<sub>D</sub><sup>23</sup> = -39.2 (c = 1.0, MeOH); HPLC (Daicel CHIRALPAK AS-H, Hexane/*i*-PrOH = 90:10, flow rate 0.5 mL/min, λ = 254 nm): t<sub>major</sub> = 25.54 min, t<sub>minor</sub> = 35.53 min, ee = 88%.

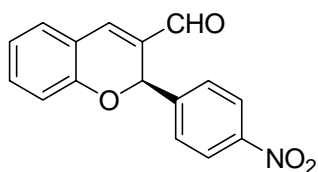

**2-(4-Nitro-phenyl)-2H-chromene-3-carbaldehyde (Table 2, entry 2):** The title compound was prepared according to the typical procedure, as described above in 96% yield. <sup>1</sup>H NMR (500 MHz, CDCl<sub>3</sub>, TMS): δ 9.68 (s, 1H; CHO), 8.11 (d, <sup>2</sup>J (H,H) = 8.5 Hz, 2H; Ar), 7.52 (d, <sup>2</sup>J (H,H) = 8.5 Hz, 2H; Ar), 7.47 (s, 1H; CH), 7.35 (t, <sup>2</sup>J (H,H) = 8.5 Hz, 1H; Ar), 7.27 (d, <sup>2</sup>J (H,H) = 6.5 Hz, 1H; Ar), 7.00 (t, <sup>2</sup>J (H,H) = 7.5 Hz, 1H; Ar), 6.93 (d, <sup>2</sup>J (H,H) = 8.0 Hz, 1H; Ar), 6.41 (s, 1H; OCH); <sup>13</sup>C NMR (125 MHz, CDCl<sub>3</sub>, TMS): δ 189.8, 154.3, 147.8, 146.1, 141.4, 134.2, 132.6, 129.7, 127.5, 123.7, 122.4, 119.5, 117.0, 72.9; [α]<sub>D</sub><sup>23</sup> = -61.0 (c = 1.0, MeOH); HPLC (Daicel CHIRALPAK AS-H, Hexane/*i*-PrOH = 60:40, flow rate 0.6 mL/min, λ = 254 nm): t<sub>major</sub> = 37.40 min, t<sub>minor</sub> = 53.40 min, ee = 95%.

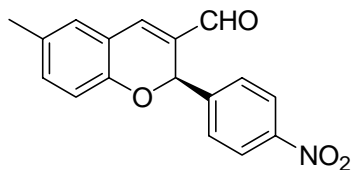

**6-Methyl-2-(4-nitro-phenyl)-2H-chromene-3-carbaldehyde (Table 2, entry 3):** The title compound was prepared according to the typical procedure, as described above in 98% yield. <sup>1</sup>H NMR (500 MHz, CDCl<sub>3</sub>, TMS): δ 9.67 (s, 1H), 8.10 (d, <sup>2</sup>J (H,H) = 9.0 Hz, 2H; Ar), 7.51 (d, <sup>2</sup>J (H,H) = 8.5 Hz, 2H; Ar), 7.42 (s, 1H; CH), 7.15 (dd, <sup>2</sup>J (H,H) = 8.5 Hz, <sup>3</sup>J (H,H) = 1.5 Hz, 1H; Ar), 7.07 (s, 1H; Ar), 6.83 (d, <sup>2</sup>J (H,H) = 8.5 Hz, 1H; Ar), 6.38 (s, 1H; OCH), 2.28 (s, 3H; CH<sub>3</sub>); <sup>13</sup>C NMR (125 MHz, CDCl<sub>3</sub>, TMS): δ

189.9, 152.2, 147.7, 146.3, 141.7, 134.9, 132.7, 131.8, 129.8, 127.4, 123.6, 119.4, 116.8, 72.7, 20.3;  $[\alpha]_D^{23} = -63.7$  ( $c = 1.0$ , EtOAc); HPLC (Daicel CHIRALPAK AS-H, Hexane/*i*-PrOH = 60:40, flow rate 0.6 mL/min,  $\lambda = 254$  nm):  $t_{\text{major}} = 25.39$  min,  $t_{\text{minor}} = 37.72$  min, ee = 96%.

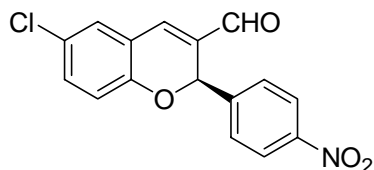

**6-Chloro-2-(4-nitro-phenyl)-2H-chromene-3-carbaldehyde (Table 2, entry 4):** The title compound was prepared according the typical procedure, as described above in 96% yield.  $^1\text{H}$  NMR (500 MHz,  $\text{CDCl}_3$ , TMS):  $\delta$  9.69 (s, 1H; CHO), 8.12 (d,  $^2J$  (H,H) = 9.0 Hz, 2H; Ar), 7.49 (d,  $^2J$  (H,H) = 8.5 Hz, 2H; Ar), 7.42 (s, 1H; CH), 7.26-7.29 (m, 2H; Ar), 6.87 (d,  $^2J$  (H,H) = 8.5 Hz, 1H; Ar), 6.40 (s, 1H; OCH);  $^{13}\text{C}$  NMR (125 MHz,  $\text{CDCl}_3$ , TMS):  $\delta$  189.6, 152.7, 147.9, 145.4, 139.8, 133.6, 133.5, 128.7, 127.5, 127.2, 123.8, 120.7, 118.4, 73.1;  $[\alpha]_D^{23} = -23.8$  ( $c = 1.0$ , MeOH); HPLC (Daicel CHIRALPAK AS-H, Hexane/EtOH = 60:40, flow rate 0.5 mL/min,  $\lambda = 254$  nm):  $t_{\text{major}} = 23.38$  min,  $t_{\text{minor}} = 42.53$  min. ee = 91%.

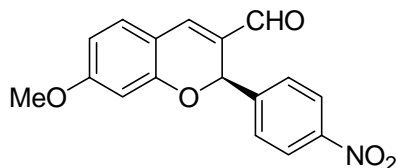

**7-Methoxy-2-(4-nitro-phenyl)-2H-chromene-3-carbaldehyde (Table 2, entry 5):** The title compound was prepared according the typical procedure, as described above in 64% yield.  $^1\text{H}$  NMR (500 MHz,  $\text{CDCl}_3$ , TMS):  $\delta$  9.61 (s, 1H; CHO), 8.13 (d,  $^2J$  (H,H) = 9.0 Hz, 2H; Ar), 7.53 (d,  $^2J$  (H,H) = 9.0 Hz, 2H; Ar), 7.42 (s, 1H; CH), 7.19 (d,  $^2J$  (H,H) = 8.5 Hz, 1H; Ar), 6.55 (dd,  $^2J$  (H,H) = 8.5 Hz,  $^3J$  (H,H) = 2.0 Hz, 1H; Ar), 6.47 (d,  $^3J$  (H,H) = 2.0 Hz, 1H; Ar), 6.41 (s, 1H; OCH), 3.82 (s, 3H;  $\text{OCH}_3$ );  $^{13}\text{C}$  NMR (125 MHz,  $\text{CDCl}_3$ , TMS):  $\delta$  189.5, 164.9, 156.3, 147.8, 146.4, 141.6, 131.0, 130.0, 127.5, 123.8, 112.9, 109.4, 102.0, 73.2, 55.6;  $[\alpha]_D^{23} = -194.6$  ( $c = 1.0$ , MeOH); HPLC (Daicel CHIRALPAK AS-H, Hexane/EtOH = 60:40, flow rate 0.6 mL/min,  $\lambda = 254$  nm):  $t_{\text{major}} = 21.75$  min,  $t_{\text{minor}} = 25.74$  min. ee = 86%.

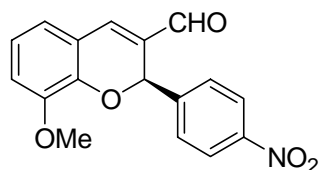

**8-Methoxy-2-(4-nitro-phenyl)-2H-chromene-3-carbaldehyde (Table 2, entry 6):** The title compound was prepared according the typical procedure, as described above in 98% yield.  $^1\text{H}$  NMR (500 MHz,  $\text{CDCl}_3$ , TMS):  $\delta$  9.69 (s, 1H; CHO), 8.08 (d,  $^2J$  (H,H) = 9.0 Hz, 2H; Ar), 7.51 (d,  $^2J$  (H,H) = 8.5 Hz, 2H; Ar), 7.45 (s, 1H; CH), 6.93-6.99 (m, 2H; Ar), 6.87 (dd,  $^2J$  (H,H) = 7.5 Hz,  $^3J$  (H,H) = 1.5 Hz, 1H; Ar), 6.48 (s, 1H; OCH), 3.88 (s, 3H;  $\text{OCH}_3$ );  $^{13}\text{C}$  NMR (125 MHz,  $\text{CDCl}_3$ , TMS):  $\delta$  190.0, 148.3, 147.7, 146.1, 143.3, 141.5, 133.0, 127.1, 123.6, 122.2, 121.3, 120.3, 116.2, 72.8, 56.2;  $[\alpha]_D^{23} = -105.9$  ( $c = 2.0$ , MeOH); HPLC (Daicel CHIRALPAK AS-H, Hexane/EtOH = 60:40, flow rate 0.6 mL/min,  $\lambda = 254$  nm):  $t_{\text{major}} = 16.84$  min,  $t_{\text{minor}} = 25.07$  min. ee = 90%.

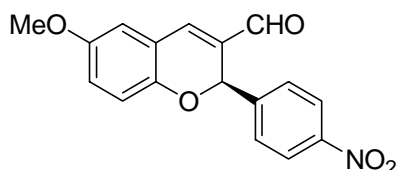

**6-Methoxy-2-(4-nitro-phenyl)-2H-chromene-3-carbaldehyde (Table 2, entry 7):** The title compound was prepared according the typical procedure, as described above in 95% yield. <sup>1</sup>H NMR (500 MHz, CDCl<sub>3</sub>, TMS): δ 9.69 (s, 1H; CHO), 8.10 (d, <sup>2</sup>J (H,H) = 8.5 Hz, 2H; Ar), 7.50 (d, <sup>2</sup>J (H,H) = 8.5 Hz, 2H; Ar), 7.44 (s, 1H; CH), 6.91 (dd, <sup>2</sup>J (H,H) = 9.0 Hz, <sup>3</sup>J (H,H) = 3.0 Hz, 1H; Ar), 6.87 (d, <sup>2</sup>J (H,H) = 9.0 Hz, 1H; Ar), 6.78 (d, <sup>3</sup>J (H,H) = 3.0 Hz, 1H; Ar), 6.36 (s, 1H; OCH), 3.78 (s, 3H; OCH<sub>3</sub>); <sup>13</sup>C NMR (125 MHz, CDCl<sub>3</sub>, TMS): δ 189.9, 154.6, 148.2, 147.7, 146.1, 141.6, 133.3, 127.5, 123.6, 120.3, 120.0, 117.9, 113.1, 72.5, 55.7; [α]<sub>D</sub><sup>23</sup> = -11.0 (c = 1.0, EtOAc); HPLC (Daicel CHIRALCEL OD-H, Hexane/EtOH = 60:40, flow rate 0.6 mL/min, λ = 254 nm): t<sub>major</sub> = 12.88 min, t<sub>minor</sub> = 14.31 min. ee = 94%.

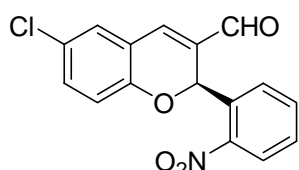

**6-Chloro-2-(2-nitro-phenyl)-2H-chromene-3-carbaldehyde (Table 2, entry 8):** The title compound was prepared according the typical procedure, as described above in 82% yield. <sup>1</sup>H NMR (500 MHz, DMSO-d<sub>6</sub>): δ 9.71 (s, 1H; CHO), 7.98 (s, 1H; CH), 7.94-7.96 (m, 1H; Ar), 7.58-7.61 (m, 3H; Ar), 7.32-7.35 (m, 2H; Ar), 6.80 (s, 1H; OCH), 6.74 (d, <sup>2</sup>J (H,H) = 8.5 Hz, 1H; Ar); <sup>13</sup>C NMR (125 MHz, DMSO-d<sub>6</sub>): δ 200.9, 161.7, 158.7, 150.8, 143.1, 143.1, 142.1, 140.7, 140.3, 138.9, 138.7, 136.1, 134.8, 131.5, 128.4, 78.6; [α]<sub>D</sub><sup>23</sup> = +176.7 (c = 1.0, EtOAc); HPLC (Daicel CHIRALCEL OD-H, Hexane/EtOH = 60:40, flow rate 0.6 mL/min, λ = 254 nm): t<sub>major</sub> = 13.88 min, t<sub>minor</sub> = 24.77 min, ee = >99%.

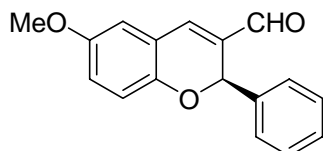

**6-Methoxy-2-phenyl-2H-chromene-3-carbaldehyde (Table 2, entry 9):** The title compound was prepared according the typical procedure, as described above in 97% yield. <sup>1</sup>H NMR (500 MHz, CDCl<sub>3</sub>, TMS): δ 9.65 (s, 1H; CHO), 7.36 (s, 1H; CH), 7.33 (m, 2H; Ar), 7.25 (m, 3H; Ar), 6.86 (d, <sup>2</sup>J (H,H) = 8.5 Hz, 1H; Ar), 6.80 (d, <sup>2</sup>J (H,H) = 8.5 Hz, 1H; Ar), 6.76 (s, 1H; Ar), 6.29 (s, 1H; OCH), 3.76 (s, 3H; OCH<sub>3</sub>); <sup>13</sup>C NMR (125 MHz, CDCl<sub>3</sub>, TMS): δ 190.0, 154.2, 148.7, 140.9, 138.8, 134.3, 128.5, 128.4, 126.7, 120.3, 119.8, 117.9, 112.9, 73.8, 55.7; [α]<sub>D</sub><sup>23</sup> = + 17.0 (c = 1.0, CHCl<sub>3</sub>); HPLC (Daicel CHIRALCEL OD-H, Hexane/*i*-PrOH = 60:40, flow rate 0.5 mL/min, λ = 254 nm): t<sub>major</sub> = 13.32 min, t<sub>minor</sub> = 17.34 min, ee = 87%.

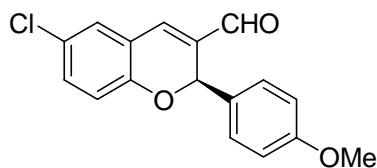

**6-Chloro-2-(4-methoxy-phenyl)-2H-chromene-3-carbaldehyde (Table 2, entry 10):** The title compound was prepared according the typical procedure, as described above in 53% yield. <sup>1</sup>H NMR (500 MHz, CDCl<sub>3</sub>, TMS): δ 9.63 (s, 1H; CHO), 7.33 (s, 1H; CH), 7.19-7.25 (m, 3H; Ar), 6.76-6.81 (m,

3H; Ar), 6.26 (s, 1H; OCH), 3.74 (s, 3H; OCH<sub>3</sub>); <sup>13</sup>C NMR (125 MHz, CDCl<sub>3</sub>): δ 189.7, 160.0, 153.1, 139.0, 134.6, 133.0, 130.5, 128.3, 126.4, 121.2, 118.6, 114.0, 74.2, 55.2; [α]<sub>D</sub><sup>23</sup> = + 27.7 (*c* = 1.0, MeOH); HPLC (Daicel CHIRALPAK AS-H, Hexane/EtOH = 60:40, flow rate 0.5 mL/min, λ = 254 nm): *t*<sub>major</sub> = 18.58 min, *t*<sub>minor</sub> = 24.78 min, ee = 75%.

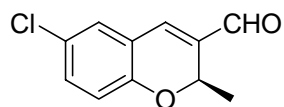

**6-Chloro-2-methyl-2H-chromene-3-carbaldehyde (Table 2, entry 11):** The title compound was prepared according the typical procedure, as described above in 67% yield. <sup>1</sup>H NMR (500 MHz, CDCl<sub>3</sub>, TMS): δ 9.56 (s, 1H; CHO), 7.25 (dd, <sup>2</sup>*J* (H,H) = 8.5 Hz, <sup>3</sup>*J* (H,H) = 2.5 Hz, 1H; Ar), 7.20 (d, <sup>3</sup>*J* (H,H) = 2.5 Hz, 1H; Ar), 7.12 (s, 1H; CH), 6.82 (d, <sup>2</sup>*J* (H,H) = 8.5 Hz, 1H; Ar), 5.41 (q, <sup>2</sup>*J* (H,H) = 6.5 Hz, 1H; OCH), 1.35 (d, <sup>2</sup>*J* (H,H) = 6.5 Hz, 3H; CH<sub>3</sub>); <sup>13</sup>C NMR (125 MHz, CDCl<sub>3</sub>, TMS): δ 189.8, 152.8, 138.6, 137.0, 132.8, 128.3, 126.4, 121.0, 118.7, 70.0, 19.8; [α]<sub>D</sub><sup>23</sup> = - 27.4 (*c* = 1.0, MeOH); HPLC (Daicel CHIRALPAK AS-H, Hexane/*i*-PrOH = 90:10, flow rate 0.5 mL/min, λ = 254 nm): *t*<sub>major</sub> = 12.31 min, *t*<sub>minor</sub> = 16.47 min, ee = 82%.

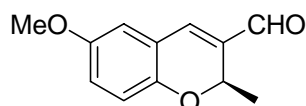

**6-Methoxy-2-methyl-2H-chromene-3-carbaldehyde (Table 2, entry 12):** The title compound was prepared according the typical procedure, as described above in 84% yield. <sup>1</sup>H NMR (500 MHz, CDCl<sub>3</sub>, TMS): δ 9.54 (s, 1H; CHO), 7.26 (s, 1H; CH), 6.88 (dd, <sup>2</sup>*J* (H,H) = 9.0 Hz, <sup>3</sup>*J* (H,H) = 3.0 Hz, 1H; Ar), 6.81 (d, <sup>2</sup>*J* (H,H) = 8.5 Hz, 1H; Ar), 6.73 (d, <sup>3</sup>*J* (H,H) = 3.0 Hz, 1H; Ar), 5.36 (q, <sup>2</sup>*J* (H,H) = 6.5 Hz, 1H; OCH), 3.78 (s, 3H; OCH<sub>3</sub>), 1.32 (d, <sup>2</sup>*J* (H,H) = 6.5 Hz, 3H; CH<sub>3</sub>); <sup>13</sup>C NMR (125 MHz, CDCl<sub>3</sub>, TMS): δ 189.9, 154.1, 148.2, 140.1, 136.8, 120.2, 119.5, 118.0, 112.8, 69.5, 55.8, 19.4; [α]<sub>D</sub><sup>23</sup> = + 10.7 (*c* = 1.0, CHCl<sub>3</sub>); HPLC (Daicel CHIRALPAK AS-H, Hexane/*i*-PrOH = 70:30, flow rate 0.5 mL/min, λ = 254 nm): *t*<sub>major</sub> = 16.26 min, *t*<sub>minor</sub> = 17.61 min, ee = 85%.

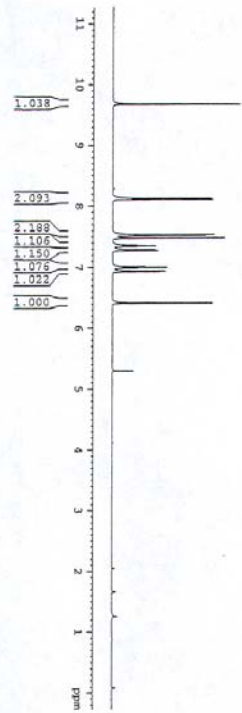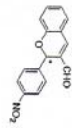

- 9.678
- 8.123
- 8.106
- 7.531
- 7.514
- 7.474
- 7.366
- 7.351
- 7.335
- 7.287
- 7.274
- 7.264
- 7.015
- 7.000
- 6.985
- 6.941
- 6.925
- 6.413

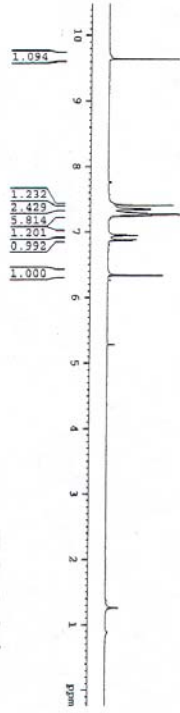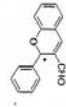

- 9.636
- 7.404
- 7.357
- 7.350
- 7.342
- 7.339
- 7.303
- 7.300
- 7.286
- 7.279
- 7.271
- 7.261
- 7.257
- 7.248
- 7.238
- 6.956
- 6.941
- 6.926
- 6.877
- 6.861
- 6.337

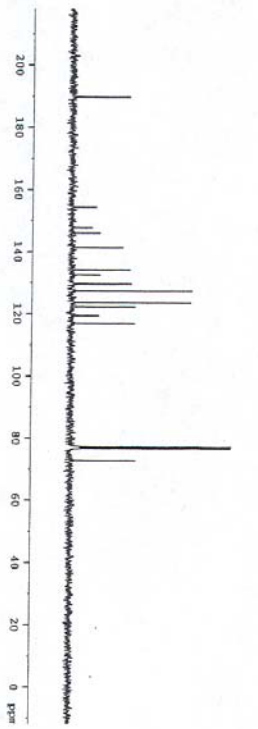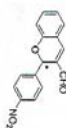

- 189.847
- 154.333
- 147.767
- 146.120
- 142.432
- 134.182
- 132.647
- 129.688
- 127.461
- 123.714
- 122.392
- 119.530
- 117.033
- 77.258
- 77.004
- 76.749
- 72.886

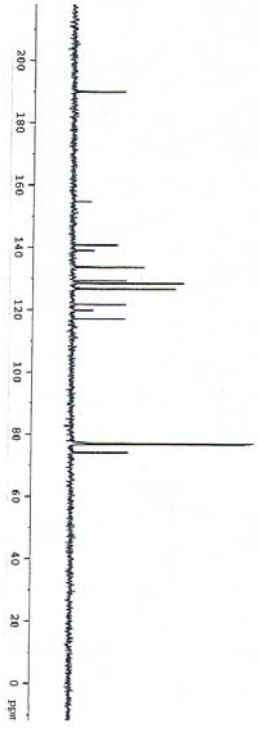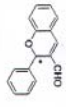

- 189.999
- 154.839
- 140.813
- 139.043
- 133.675
- 129.343
- 128.605
- 128.511
- 126.704
- 121.741
- 119.941
- 117.127
- 77.254
- 77.000
- 76.746
- 74.187

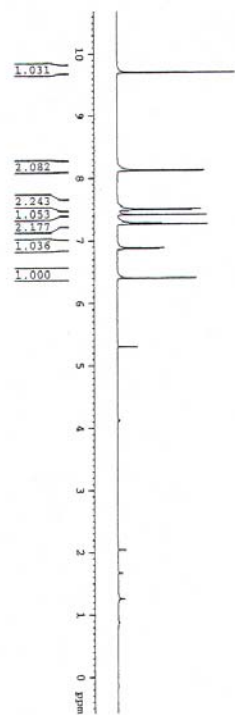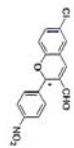

- 9.693
- 8.135
- 8.131
- 8.121
- 8.117
- 7.507
- 7.490
- 7.417
- 7.293
- 7.287
- 7.276
- 7.270
- 7.269
- 7.264
- 6.885
- 6.868
- 6.404

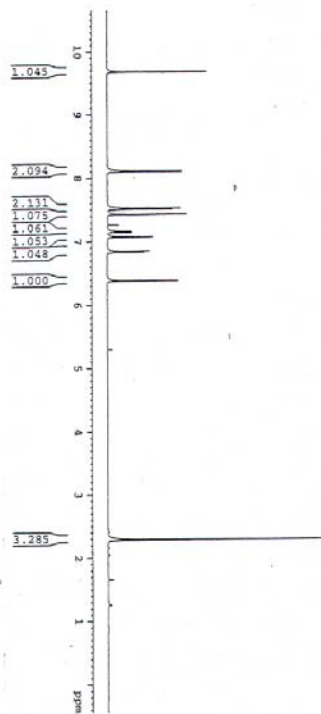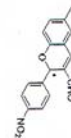

- 9.671
- 8.113
- 8.095
- 7.521
- 7.504
- 7.422
- 7.161
- 7.158
- 7.145
- 7.141
- 7.069
- 6.844
- 6.827
- 6.380
- 2.284

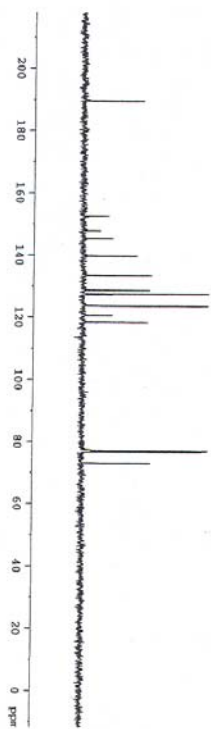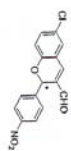

- 189.601
- 152.697
- 147.900
- 145.426
- 139.811
- 133.577
- 131.490
- 128.746
- 127.810
- 127.206
- 123.784
- 120.684
- 118.435
- 77.258
- 77.004
- 76.750
- 73.127

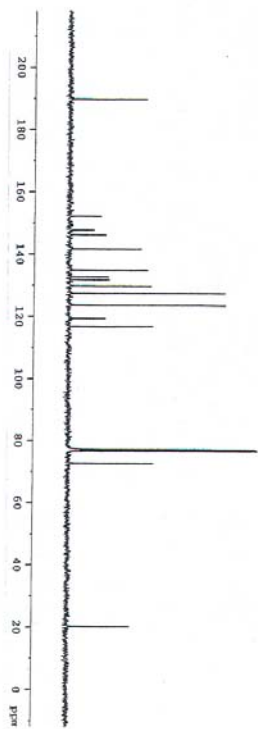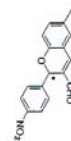

- 189.866
- 152.229
- 147.720
- 146.272
- 141.667
- 134.926
- 132.716
- 131.826
- 129.780
- 127.423
- 123.648
- 119.384
- 116.783
- 77.247
- 76.993
- 76.739
- 72.717
- 20.332

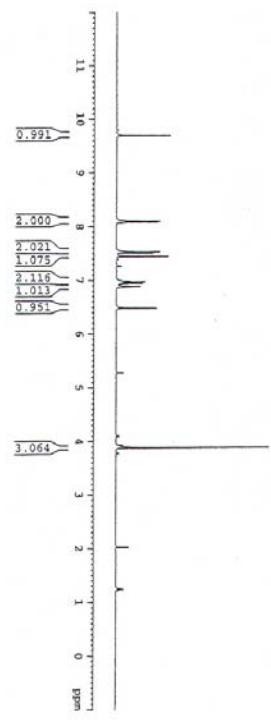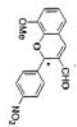

- 9.694
- 8.097
- 8.079
- 7.528
- 7.511
- 7.445
- 7.260
- 7.260
- 6.989
- 6.986
- 6.972
- 6.970
- 6.958
- 6.944
- 6.928
- 6.899
- 6.886
- 6.874
- 6.871
- 6.478

3.880

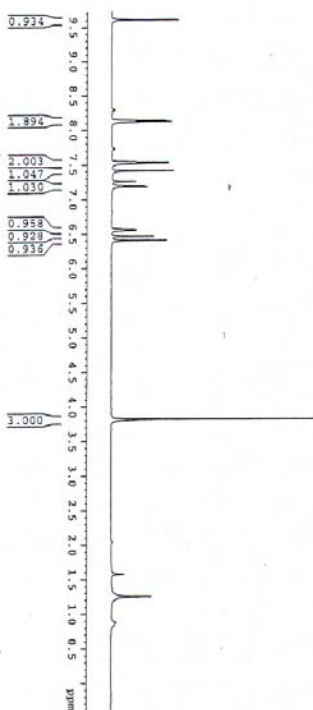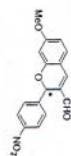

- 9.608
- 8.141
- 8.123
- 7.540
- 7.522
- 7.415
- 7.260
- 7.201
- 7.184
- 6.972
- 6.968
- 6.956
- 6.551
- 6.472
- 6.468
- 6.408

3.821

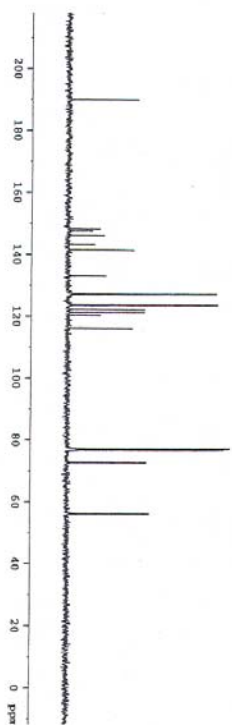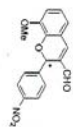

- 189.998
- 148.298
- 147.724
- 146.093
- 143.326
- 141.470
- 132.998
- 127.139
- 123.626
- 122.212
- 121.288
- 120.314
- 116.157
- 77.257
- 77.003
- 76.749
- 72.757
- 56.169

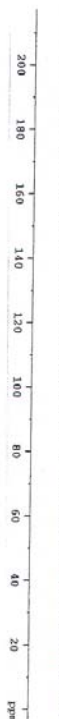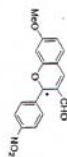

- 189.489
- 164.877
- 156.284
- 147.814
- 146.422
- 141.584
- 131.007
- 129.970
- 127.461
- 123.774
- 112.920
- 109.415
- 102.004
- 77.257
- 77.003
- 76.749
- 73.240
- 55.632



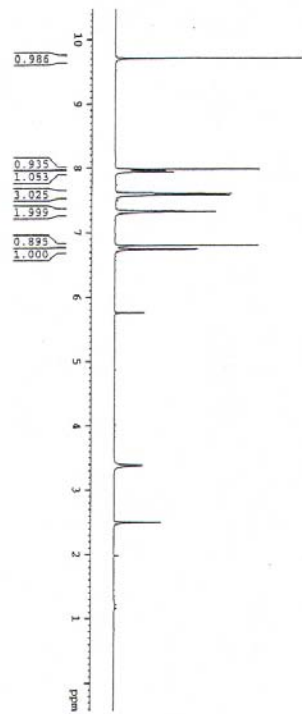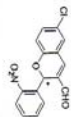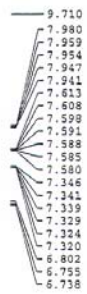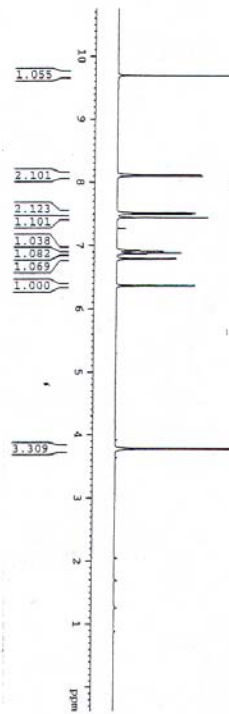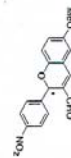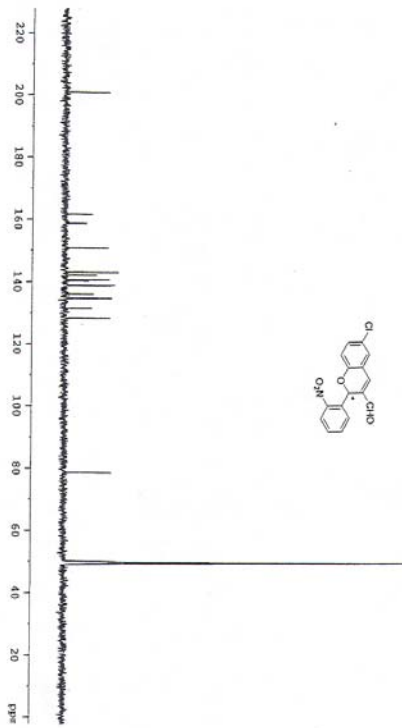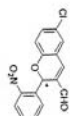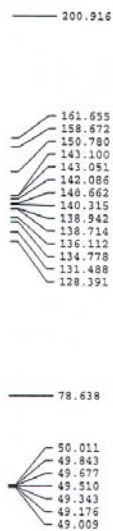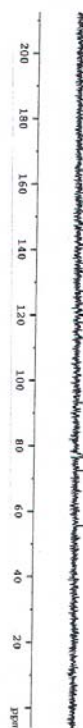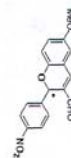

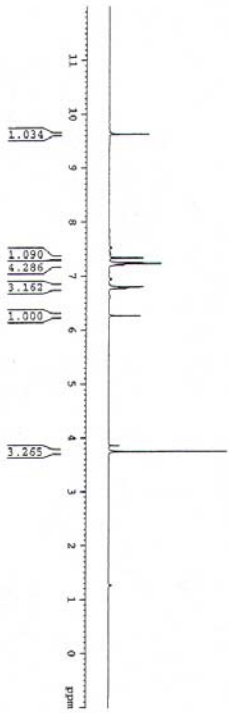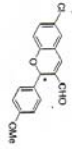

- 9.629
- 7.334
- 7.247
- 7.234
- 7.230
- 7.214
- 7.209
- 7.191
- 6.806
- 6.788
- 6.776
- 6.759
- 6.258
- 3.742

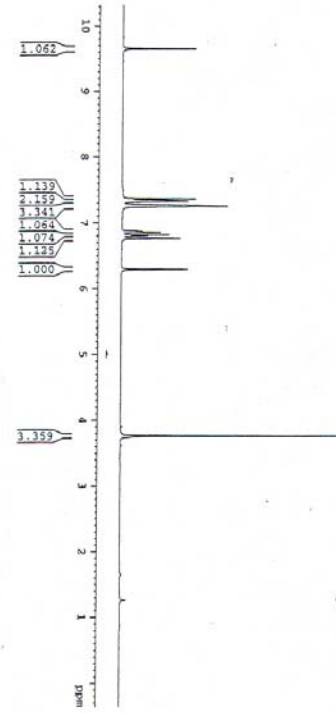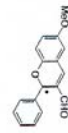

- 9.645
- 7.362
- 7.325
- 7.251
- 6.872
- 6.855
- 6.816
- 6.798
- 6.763
- 6.290
- 3.760

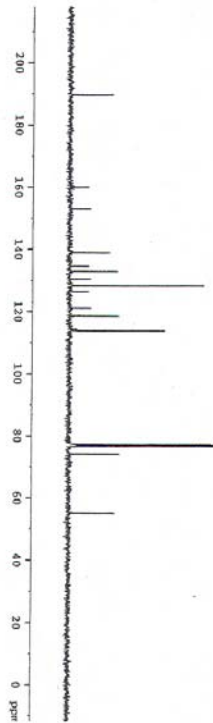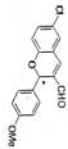

- 189.705
- 160.025
- 153.109
- 138.962
- 134.628
- 132.998
- 130.482
- 129.312
- 126.385
- 121.172
- 119.609
- 111.955
- 77.261
- 77.007
- 76.753
- 74.228
- 55.180

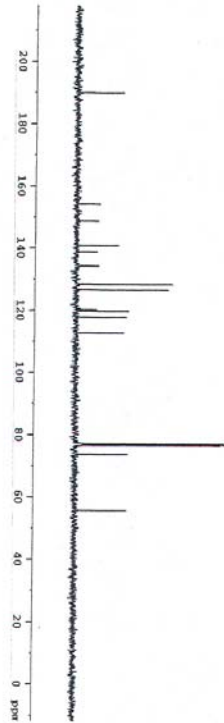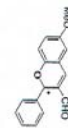

- 189.981
- 154.155
- 148.709
- 140.907
- 138.824
- 134.280
- 128.513
- 128.434
- 126.679
- 120.332
- 119.803
- 117.903
- 112.906
- 77.248
- 76.994
- 76.740
- 73.793
- 55.684

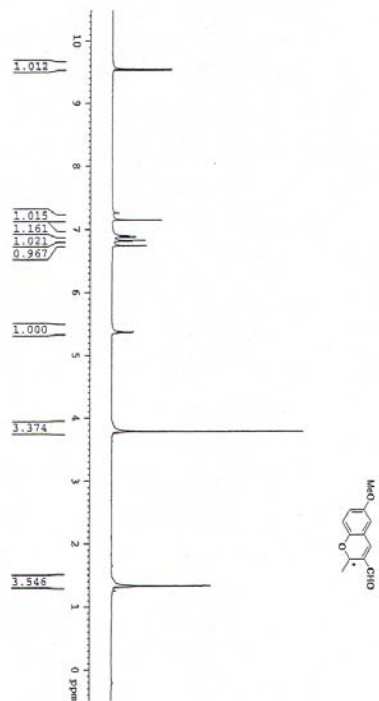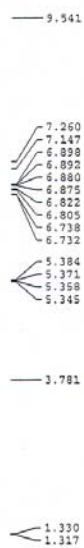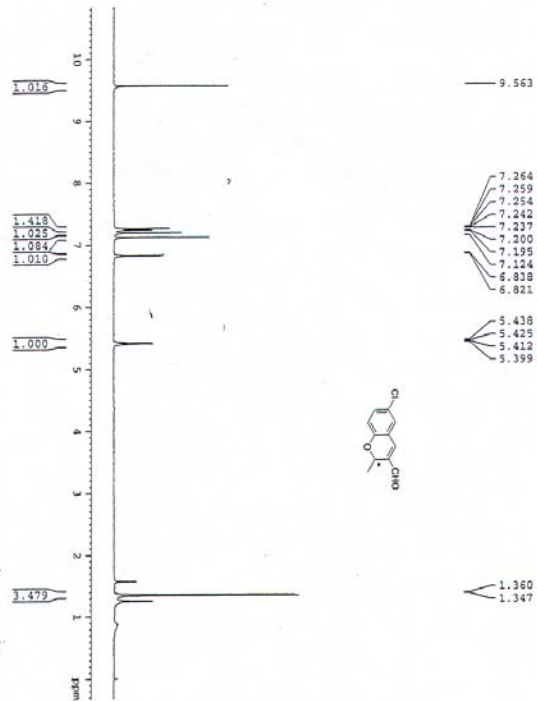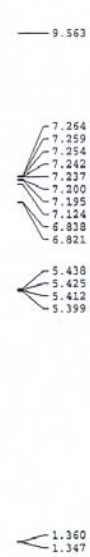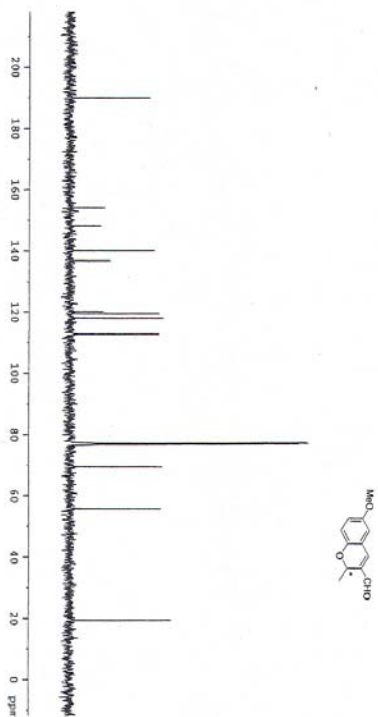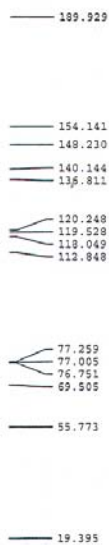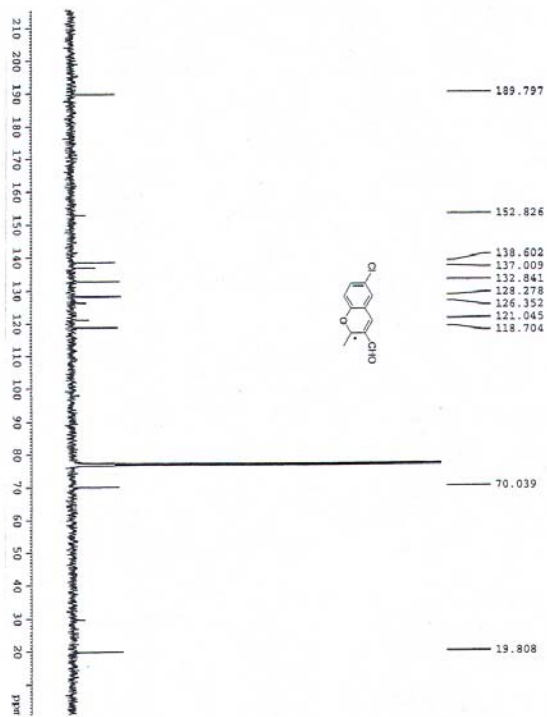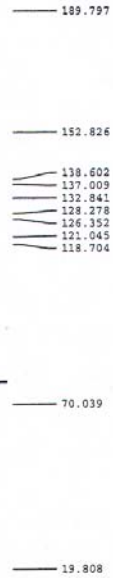

University Of New Mexico  
Department of Chemistry

Method Name: C:\ESIStart\Projects\Default\Method\hla104.met  
Data File: C:\ESIStart\Projects\WaiWang\hla104i.dat  
Date Acquired: 3/15/2006 10:38:19 AM Date Printed: 05/03/2006 09:51:21 AM  
Sample ID: hla104

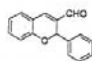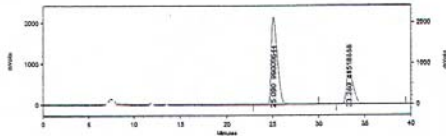

| SPD-10Avp         |        |          |         |  |
|-------------------|--------|----------|---------|--|
| Chl-254nm Results |        |          |         |  |
| PK #              | RT     | Area     | Area %  |  |
| 1                 | 25.530 | 9909564  | 70.133  |  |
| 2                 | 33.280 | 4151888  | 29.545  |  |
| Totals            |        | 14052852 | 100.000 |  |

University Of New Mexico  
Department of Chemistry

Method Name: C:\ESIStart\Projects\Default\Method\hla0357.met  
Data File: C:\ESIStart\Projects\WaiWang\hla104i.dat  
Date Acquired: 3/21/2006 10:46:01 PM Date Printed: 05/03/2006 09:52:32 AM  
Sample ID: hla104

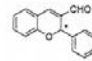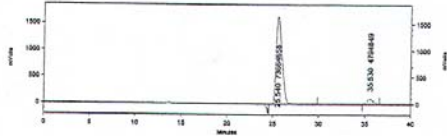

| SPD-10Avp         |        |          |         |  |
|-------------------|--------|----------|---------|--|
| Chl-254nm Results |        |          |         |  |
| PK #              | RT     | Area     | Area %  |  |
| 1                 | 25.530 | 7384058  | 33.883  |  |
| 2                 | 35.530 | 4794849  | 6.111   |  |
| Totals            |        | 78459507 | 100.000 |  |

University Of New Mexico  
Department of Chemistry

Method Name: C:\ESIStart\Projects\Default\Method\hla041.met  
Data File: C:\ESIStart\Projects\WaiWang\hla29a1.dat  
Date Acquired: 3/27/2006 10:24:15 PM Date Printed: 05/03/2006 09:55:16 AM  
Sample ID: hla29a

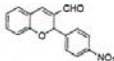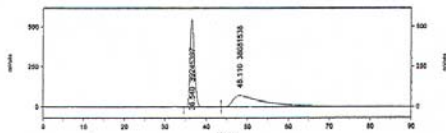

| SPD-10Avp         |        |          |         |  |
|-------------------|--------|----------|---------|--|
| Chl-254nm Results |        |          |         |  |
| PK #              | RT     | Area     | Area %  |  |
| 1                 | 36.540 | 39245297 | 50.182  |  |
| 2                 | 48.110 | 38681538 | 49.638  |  |
| Totals            |        | 77926925 | 100.000 |  |

University Of New Mexico  
Department of Chemistry

Method Name: C:\ESIStart\Projects\Default\Method\hla041.met  
Data File: C:\ESIStart\Projects\WaiWang\hla104i.dat  
Date Acquired: 3/31/2006 11:12:10 AM Date Printed: 05/03/2006 09:56:45 AM  
Sample ID: hla38a

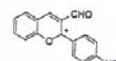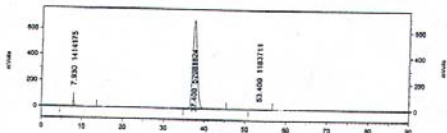

| SPD-10Avp         |        |          |        |  |
|-------------------|--------|----------|--------|--|
| Chl-254nm Results |        |          |        |  |
| PK #              | RT     | Area     | Area % |  |
| 2                 | 37.400 | 32091874 | 38.249 |  |
| 3                 | 53.400 | 1183711  | 2.165  |  |
| Totals            |        | 53265535 | 97.414 |  |

University Of New Mexico  
Department of Chemistry

Method Name: C:\ESIStart\Projects\Default\Method\hla041.met  
Data File: C:\ESIStart\Projects\WaiWang\hla104i.dat  
Date Acquired: 4/1/2006 4:58:36 PM Date Printed: 05/03/2006 09:57:31 AM  
Sample ID: hla10e

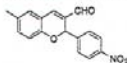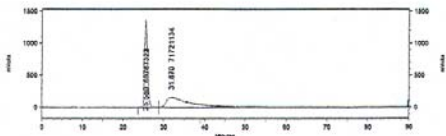

| SPD-10Avp         |        |           |         |  |
|-------------------|--------|-----------|---------|--|
| Chl-254nm Results |        |           |         |  |
| PK #              | RT     | Area      | Area %  |  |
| 1                 | 25.380 | 69787327  | 48.317  |  |
| 2                 | 31.870 | 7121134   | 50.683  |  |
| Totals            |        | 141508456 | 100.000 |  |

University Of New Mexico  
Department of Chemistry

Method Name: C:\ESIStart\Projects\Default\Method\hla041.met  
Data File: C:\ESIStart\Projects\WaiWang\hla104i.dat  
Date Acquired: 4/1/2006 6:38:30 PM Date Printed: 05/03/2006 10:01:18 AM  
Sample ID: hla17a

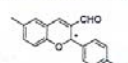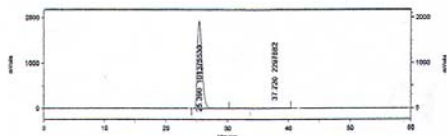

| SPD-10Avp         |        |           |         |  |
|-------------------|--------|-----------|---------|--|
| Chl-254nm Results |        |           |         |  |
| PK #              | RT     | Area      | Area %  |  |
| 1                 | 25.390 | 101375530 | 97.184  |  |
| 2                 | 37.720 | 2897682   | 2.816   |  |
| Totals            |        | 103673212 | 100.000 |  |

University Of New Mexico  
Department of Chemistry

Method Name: C:\E2Start\Projects\Default\Method\hla411.met  
Data File: C:\E2Start\Projects\WeiWang\hla411.dat  
Date Acquired: 4/2/2006 11:15:47 PM Date Printed: 05/03/2006 09:58:25 AM  
Sample ID: hla41e

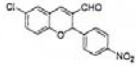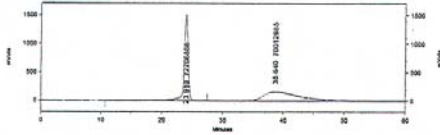

| SPD-10Avp         |        |           |         |  |
|-------------------|--------|-----------|---------|--|
| Ch1-254nm Results |        |           |         |  |
| Pk #              | RT     | Area      | Area %  |  |
| 1                 | 23.910 | 7270888   | 50.944  |  |
| 2                 | 38.640 | 70012985  | 49.056  |  |
| Totals            |        | 142719853 | 100.000 |  |

University Of New Mexico  
Department of Chemistry

Method Name: C:\E2Start\Projects\Default\Method\hla491.met  
Data File: C:\E2Start\Projects\WeiWang\hla491.dat  
Date Acquired: 4/2/2006 10:55:03 AM Date Printed: 05/03/2006 10:02:03 AM  
Sample ID: hla49e

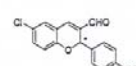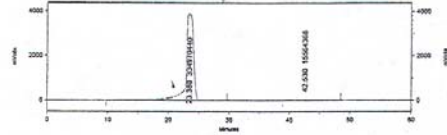

| SPD-10Avp         |        |           |         |  |
|-------------------|--------|-----------|---------|--|
| Ch1-254nm Results |        |           |         |  |
| Pk #              | RT     | Area      | Area %  |  |
| 1                 | 23.380 | 334970440 | 95.560  |  |
| 2                 | 42.530 | 15564368  | 4.440   |  |
| Totals            |        | 350534808 | 100.000 |  |

University Of New Mexico  
Department of Chemistry

Method Name: C:\E2Start\Projects\Default\Method\hla411.met  
Data File: C:\E2Start\Projects\WeiWang\hla41e.dat  
Date Acquired: 4/6/2006 11:21:48 PM Date Printed: 05/03/2006 09:59:43 AM  
Sample ID: hla41e

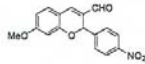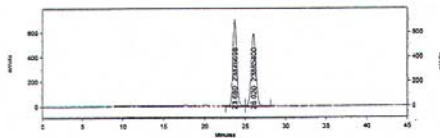

| SPD-10Avp         |        |          |         |  |
|-------------------|--------|----------|---------|--|
| Ch1-254nm Results |        |          |         |  |
| Pk #              | RT     | Area     | Area %  |  |
| 1                 | 23.680 | 23875038 | 49.991  |  |
| 2                 | 26.020 | 23885400 | 50.009  |  |
| Totals            |        | 47760438 | 100.000 |  |

University Of New Mexico  
Department of Chemistry

Method Name: C:\E2Start\Projects\Default\Method\hla411.met  
Data File: C:\E2Start\Projects\WeiWang\hla501e.dat  
Date Acquired: 4/6/2006 2:26:54 PM Date Printed: 05/03/2006 10:02:42 AM  
Sample ID: hla50e

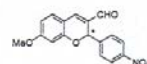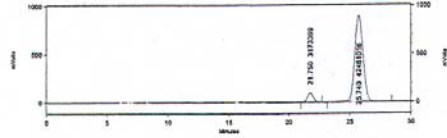

| SPD-10Avp         |        |          |         |  |
|-------------------|--------|----------|---------|--|
| Ch1-254nm Results |        |          |         |  |
| Pk #              | RT     | Area     | Area %  |  |
| 1                 | 23.760 | 3173333  | 6.951   |  |
| 2                 | 25.740 | 42481016 | 93.049  |  |
| Totals            |        | 45654349 | 100.000 |  |

University Of New Mexico  
Department of Chemistry

Method Name: C:\E2Start\Projects\Default\Method\hla4105.met  
Data File: C:\E2Start\Projects\WeiWang\hla44e2.dat  
Date Acquired: 4/2/2006 12:59:25 PM Date Printed: 05/03/2006 10:00:40 AM  
Sample ID: hla41e

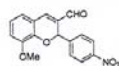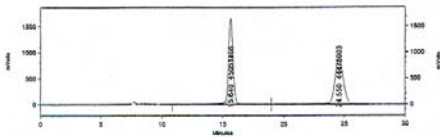

| SPD-10Avp         |        |          |         |  |
|-------------------|--------|----------|---------|--|
| Ch1-254nm Results |        |          |         |  |
| Pk #              | RT     | Area     | Area %  |  |
| 1                 | 15.840 | 43051466 | 50.321  |  |
| 2                 | 24.950 | 44478903 | 49.679  |  |
| Totals            |        | 89528369 | 100.000 |  |

University Of New Mexico  
Department of Chemistry

Method Name: C:\E2Start\Projects\Default\Method\hla4106.met  
Data File: C:\E2Start\Projects\WeiWang\hla41e1.dat  
Date Acquired: 4/3/2006 11:16:22 AM Date Printed: 05/03/2006 10:03:15 AM  
Sample ID: hla41e

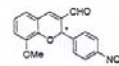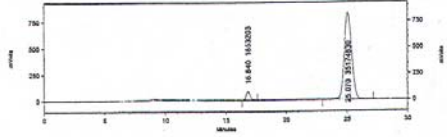

| SPD-10Avp         |        |          |         |  |
|-------------------|--------|----------|---------|--|
| Ch1-254nm Results |        |          |         |  |
| Pk #              | RT     | Area     | Area %  |  |
| 1                 | 16.840 | 1933253  | 5.003   |  |
| 2                 | 25.070 | 35174830 | 94.997  |  |
| Totals            |        | 37028083 | 100.000 |  |

University Of New Mexico  
Department of Chemistry

Method Name: C:\ESIstart\Projects\Default\Method\HsL102.met  
Data File: C:\ESIstart\Projects\WaiWang\hls42a2.dat  
Date Acquired: 4/9/2006 12:00:59 PM Date Printed: 05/03/2006 10:19:20 AM  
Sample ID: hls42a

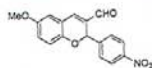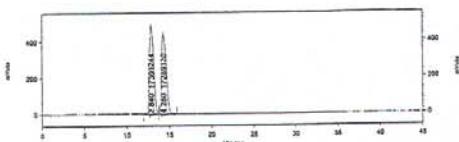

| SPD-10Avp<br>Chl-254nm Results |        |          |         |
|--------------------------------|--------|----------|---------|
| PK #                           | RT     | Area     | Area %  |
| 1                              | 12.840 | 13301244 | 50.018  |
| 2                              | 14.280 | 17289120 | 49.982  |
| Totals                         |        | 34590364 | 100.000 |

University Of New Mexico  
Department of Chemistry

Method Name: C:\ESIstart\Projects\Default\Method\HsL11.met  
Data File: C:\ESIstart\Projects\WaiWang\hls46a1.dat  
Date Acquired: 4/12/2006 2:21:32 PM Date Printed: 05/03/2006 10:17:28 AM  
Sample ID: hls46a

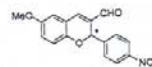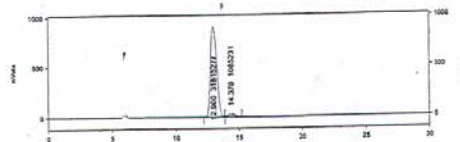

| SPD-10Avp<br>Chl-254nm Results |        |          |         |
|--------------------------------|--------|----------|---------|
| PK #                           | RT     | Area     | Area %  |
| 1                              | 12.940 | 31813277 | 96.701  |
| 2                              | 14.370 | 1085231  | 3.299   |
| Totals                         |        | 31900508 | 100.000 |

University Of New Mexico  
Department of Chemistry

Method Name: C:\ESIstart\Projects\Default\Method\HsL102.met  
Data File: C:\ESIstart\Projects\WaiWang\hls71a1.dat  
Date Acquired: 4/9/2006 1:19:19 PM Date Printed: 05/03/2006 10:20:06 AM  
Sample ID: hls71a

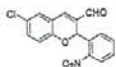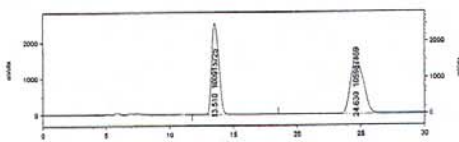

| SPD-10Avp<br>Chl-254nm Results |        |           |         |
|--------------------------------|--------|-----------|---------|
| PK #                           | RT     | Area      | Area %  |
| 1                              | 13.510 | 100915725 | 68.774  |
| 2                              | 24.630 | 105987869 | 51.226  |
| Totals                         |        | 206903594 | 100.000 |

University Of New Mexico  
Department of Chemistry

Method Name: C:\ESIstart\Projects\Default\Method\HsL109.met  
Data File: C:\ESIstart\Projects\WaiWang\hls71a1.dat  
Date Acquired: 4/19/2006 10:34:31 AM Date Printed: 05/03/2006 10:21:28 AM  
Sample ID: hls71a

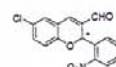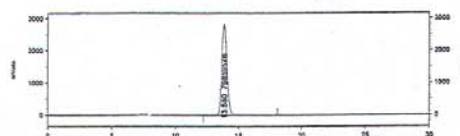

| SPD-10Avp<br>Chl-254nm Results |        |          |         |
|--------------------------------|--------|----------|---------|
| PK #                           | RT     | Area     | Area %  |
| 1                              | 13.890 | 78859878 | 100.000 |
| Totals                         |        | 78859878 | 100.000 |

University Of New Mexico  
Department of Chemistry

Method Name: C:\ESIstart\Projects\Default\Method\HsL107.met  
Data File: C:\ESIstart\Projects\WaiWang\hls80a1.dat  
Date Acquired: 4/18/2006 8:14:33 PM Date Printed: 05/03/2006 10:23:19 AM  
Sample ID: hls80a

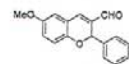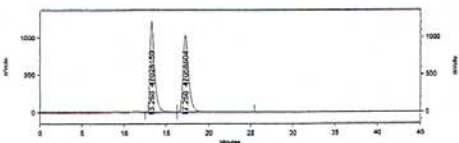

| SPD-10Avp<br>Chl-254nm Results |        |          |         |
|--------------------------------|--------|----------|---------|
| PK #                           | RT     | Area     | Area %  |
| 1                              | 13.260 | 47028150 | 49.984  |
| 2                              | 17.250 | 47058604 | 50.016  |
| Totals                         |        | 94086754 | 100.000 |

University Of New Mexico  
Department of Chemistry

Method Name: C:\ESIstart\Projects\Default\Method\HsL109.met  
Data File: C:\ESIstart\Projects\WaiWang\hls88a1.dat  
Date Acquired: 4/19/2006 11:57:52 AM Date Printed: 05/03/2006 10:28:57 AM  
Sample ID: hls88a

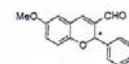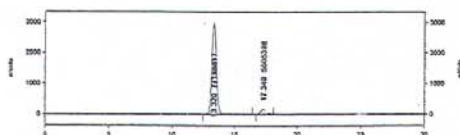

| SPD-10Avp<br>Chl-254nm Results |        |          |         |
|--------------------------------|--------|----------|---------|
| PK #                           | RT     | Area     | Area %  |
| 1                              | 13.320 | 77189817 | 93.230  |
| 2                              | 17.340 | 5605398  | 6.770   |
| Totals                         |        | 82794215 | 100.000 |

University Of New Mexico  
Department of Chemistry

Method Name: C:\EJStart\Projects\Default\Method\HaoL102.met  
Data File: C:\EJStart\Projects\WaiWang\hla57e1.dat  
Date Acquired: 4/9/2006 2:58:40 PM Date Printed: 05/03/2006 10:09:14 AM  
Sample ID: hla57e

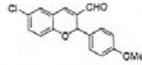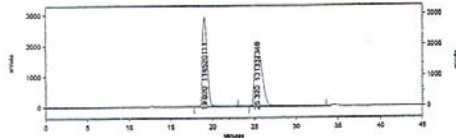

| SPD-10Avp         |        |           |         |  |
|-------------------|--------|-----------|---------|--|
| Chl-254nm Results |        |           |         |  |
| PK #              | RT     | Area      | Area %  |  |
| 1                 | 19.020 | 114320111 | 46.380  |  |
| 2                 | 25.320 | 131337346 | 53.620  |  |
| TOTALS            |        | 245657457 | 100.000 |  |

University Of New Mexico  
Department of Chemistry

Method Name: C:\EJStart\Projects\Default\Method\HaoL102.met  
Data File: C:\EJStart\Projects\WaiWang\hla57e1.dat  
Date Acquired: 4/10/2006 11:32:27 AM Date Printed: 05/03/2006 10:14:25 AM  
Sample ID: hla57e

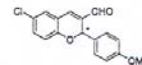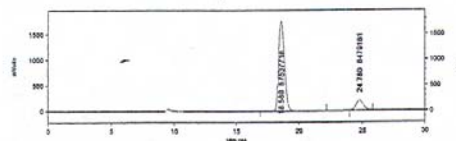

| SPD-10Avp         |        |          |         |  |
|-------------------|--------|----------|---------|--|
| Chl-254nm Results |        |          |         |  |
| PK #              | RT     | Area     | Area %  |  |
| 1                 | 18.390 | 37537915 | 87.126  |  |
| 2                 | 24.780 | 8479101  | 12.844  |  |
| TOTALS            |        | 46016899 | 100.000 |  |

University Of New Mexico  
Department of Chemistry

Method Name: C:\EJStart\Projects\Default\Method\HaoL102.met  
Data File: C:\EJStart\Projects\WaiWang\hla52e.dat  
Date Acquired: 4/7/2006 11:59:08 AM Date Printed: 05/03/2006 10:07:06 AM  
Sample ID: hla52e

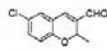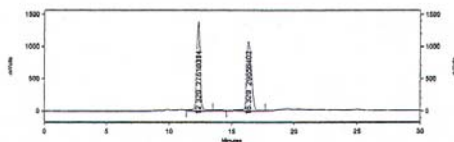

| SPD-10Avp         |        |          |         |  |
|-------------------|--------|----------|---------|--|
| Chl-254nm Results |        |          |         |  |
| PK #              | RT     | Area     | Area %  |  |
| 1                 | 12.320 | 29810314 | 48.214  |  |
| 2                 | 16.320 | 29696402 | 51.786  |  |
| TOTALS            |        | 57266716 | 100.000 |  |

University Of New Mexico  
Department of Chemistry

Method Name: C:\EJStart\Projects\Default\Method\HaoL102.met  
Data File: C:\EJStart\Projects\WaiWang\hla59e1.dat  
Date Acquired: 4/7/2006 11:27:51 AM Date Printed: 05/03/2006 10:07:43 AM  
Sample ID: hla59e

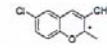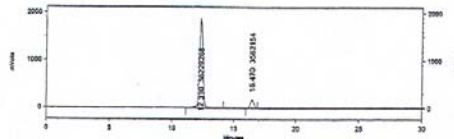

| SPD-10Avp         |        |          |         |  |
|-------------------|--------|----------|---------|--|
| Chl-254nm Results |        |          |         |  |
| PK #              | RT     | Area     | Area %  |  |
| 1                 | 12.310 | 36223260 | 91.348  |  |
| 2                 | 16.470 | 3562154  | 8.952   |  |
| TOTALS            |        | 39785412 | 100.000 |  |

University Of New Mexico  
Department of Chemistry

Method Name: C:\EJStart\Projects\Default\Method\HaoL102.met  
Data File: C:\EJStart\Projects\WaiWang\hla52e1.dat  
Date Acquired: 4/17/2006 2:20:48 PM Date Printed: 05/03/2006 10:25:36 AM  
Sample ID: hla52e

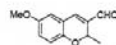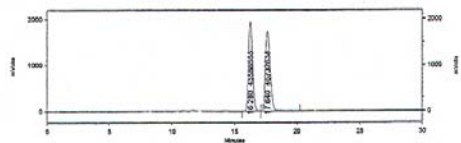

| SPD-10Avp         |        |          |         |  |
|-------------------|--------|----------|---------|--|
| Chl-254nm Results |        |          |         |  |
| PK #              | RT     | Area     | Area %  |  |
| 1                 | 15.130 | 43585555 | 49.379  |  |
| 2                 | 17.640 | 46732638 | 50.621  |  |
| TOTALS            |        | 92318193 | 100.000 |  |

University Of New Mexico  
Department of Chemistry

Method Name: C:\EJStart\Projects\Default\Method\HaoL109.met  
Data File: C:\EJStart\Projects\WaiWang\hla56e1.dat  
Date Acquired: 4/19/2006 12:48:47 PM Date Printed: 05/03/2006 10:29:41 AM  
Sample ID: hla56e

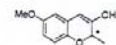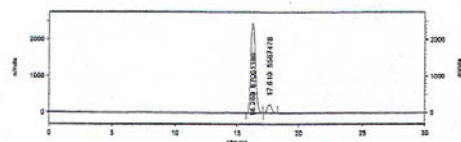

| SPD-10Avp         |        |          |         |  |
|-------------------|--------|----------|---------|--|
| Chl-254nm Results |        |          |         |  |
| PK #              | RT     | Area     | Area %  |  |
| 1                 | 16.200 | 87061190 | 92.334  |  |
| 2                 | 17.610 | 5567478  | 7.666   |  |
| TOTALS            |        | 72628668 | 100.000 |  |
